# Supplementary material for: Attitudes towards risk-reducing early salpingectomy with delayed oophorectomy for ovarian cancer prevention: a cohort study
Source: PubMed Central journal article supplement — BJOG. Author manuscript; Available in PMC 2023 Jul 3. (PMC7614715; doi:10.1111/1471-0528.16424), 2020-08-16
Supplement: EMS177346-supplement-Supplementary_tables.pdf [file EMS177346-supplement-Supplementary_tables.pdf]

**Table S1.** Factors affecting not sure versus no questionnaire responses on acceptability of undergoing RRESDO amongst premenopausal women who have not undergone RRSO

|                                                                                           | <b>OR</b> | <b>Std.<br/>Err</b> | <b>P&gt; z </b> | <b>95% CI</b>   |
|-------------------------------------------------------------------------------------------|-----------|---------------------|-----------------|-----------------|
| <b>Prior knowledge of tubal origin of OC</b>                                              | 1.323     | 0.475               | 0.555           | 0.525 to 3.42   |
| <b>Personal history of BC</b>                                                             | 2.309     | 0.649               | 0.198           | 0.66 to 8.612   |
| <b>Previous RRM</b>                                                                       | 0.721     | 0.528               | 0.537           | 0.25 to 2.014   |
| <b>Family complete</b>                                                                    | 2.246     | 0.586               | 0.168           | 0.72 to 7.313   |
| <b>Carrier status</b>                                                                     | 2.472     | 1.391               | 0.515           | 0.186 to 65.46  |
| <b>Marital status</b>                                                                     | 0.78      | 0.499               | 0.617           | 0.291 to 2.087  |
| <b>Ethnicity</b>                                                                          | 0.754     | 0.707               | 0.689           | 0.185 to 3.083  |
| <b>Education</b>                                                                          | 0.741     | 0.556               | 0.589           | 0.243 to 2.184  |
| <b>Income</b>                                                                             | 1.236     | 0.231               | 0.359           | 0.787 to 1.963  |
| <b>Timing of Surgery</b>                                                                  | 0.415     | 1.393               | 0.528           | 0.015 to 5.335  |
| <b>Family history</b>                                                                     |           |                     |                 |                 |
| <b>BC</b>                                                                                 | 1.8       | 0.742               | 0.428           | 0.421 to 8.126  |
| <b>OC</b>                                                                                 | 0.393     | 1.022               | 0.361           | 0.048 to 2.84   |
| <b>BC and OC</b>                                                                          | 2.726     | 1.146               | 0.381           | 0.299 to 28.37  |
| <b>Concerns over premature menopause sequelae influencing decision to undergo RRESDO:</b> |           |                     |                 |                 |
| <b>Hot flushes/night sweats</b>                                                           | 1.636     | 0.795               | 0.536           | 0.34 to 7.958   |
| <b>Looking older</b>                                                                      | 0.435     | 0.799               | 0.297           | 0.088 to 2.074  |
| <b>Decreased libido/other sexual side effects</b>                                         | 0.971     | 0.765               | 0.97            | 0.212 to 4.413  |
| <b>Loss of fertility</b>                                                                  | 0.564     | 0.735               | 0.436           | 0.128 to 2.366  |
| <b>Osteoporosis</b>                                                                       | 2.03      | 0.851               | 0.405           | 0.386 to 11.539 |
| <b>Heart disease</b>                                                                      | 0.393     | 0.949               | 0.325           | 0.054 to 2.359  |
| <b>Dementia/memory dysfunction</b>                                                        | 3.31      | 0.928               | 0.197           | 0.557 to 22.357 |
| <b>Impact on survival</b>                                                                 | 0.437     | 0.72                | 0.251           | 0.099 to 1.714  |
| <b>Acceptability of having to take HRT until 51 years</b>                                 | 2.638     | 0.71                | 0.172           | 0.684 to 11.341 |
| <b>Potential benefits of RRESDO influencing decision to undergo RRESDO:</b>               |           |                     |                 |                 |
| <b>Reduces risk of ovarian cancer without premature menopause</b>                         | 3.823     | 1.192               | 0.261           | 0.413 to 54.046 |
| <b>Inspection of tubes/ovaries by doctor delays hot flushes, night sweats</b>             | 0.643     | 0.79                | 0.577           | 0.127 to 2.989  |
| <b>delays osteoporosis</b>                                                                | 2.077     | 0.909               | 0.421           | 0.338 to 12.637 |
| <b>delays potential change to sexual function</b>                                         | 1.237     | 1.92                | 0.912           | 0.041 to 94.981 |
| <b>Not associated with increased risk of heart disease</b>                                | 1.468     | 0.933               | 0.68            | 0.234 to 9.684  |
| <b>Not associated with increased risk of heart disease</b>                                | 0.941     | 1.817               | 0.973           | 0.02 to 32.459  |
| <b>Potential limitations of RRESDO influencing decision to undergo RRESDO:</b>            |           |                     |                 |                 |
| <b>Two staged surgery</b>                                                                 | 6.719     | 0.767               | 0.013           | 1.605 to 34.005 |
|                                                                                           | <b>OR</b> | <b>Std.<br/>Err</b> | <b>P&gt; z </b> | <b>95% CI</b>   |
| <b>Potential premature menopause</b>                                                      | 1.361     | 0.695               | 0.658           | 0.336 to 5.341  |
| <b>Increased complication rate</b>                                                        | 0.841     | 0.771               | 0.823           | 0.174 to 3.754  |
| <b>Interval monitoring between surgeries</b>                                              | 8.855     | 0.974               | 0.025           | 1.465 to 71.831 |

|                                                                     |       |       |       |                 |
|---------------------------------------------------------------------|-------|-------|-------|-----------------|
| <b>Additional time in hospital</b>                                  | 0.546 | 1.133 | 0.592 | 0.053 to 4.921  |
| <b>Additional time off work for surgery/post-operative recovery</b> | 3.959 | 0.895 | 0.124 | 0.73 to 25.941  |
| <b>Precise level of OC risk reduction with ES unknown</b>           | 0.794 | 0.773 | 0.765 | 0.166 to 3.63   |
| <b>Developing an interval OC between the two surgeries</b>          | 4.092 | 0.784 | 0.073 | 0.926 to 21.065 |

RRESDO – risk reducing early salpingectomy with delayed oophorectomy; OC – ovarian cancer; BC – breast cancer; FH – family history; RRM – risk reducing mastectomy; HRT – hormone replacement therapy.

Multiple logistic regression analysis on factors affecting acceptability of undergoing RRESDO (“not sure” versus “no” responses) in 117 premenopausal women who have not undergone RRSO. Model adjusted for marital status, ethnicity, education, income, family history of ovarian cancer/breast cancer, risk reducing mastectomy and personal history of breast cancer.

Prior knowledge of tubal origin of OC: yes vs no; personal history of BC: yes vs no; previous RRM: yes vs no; family complete: no vs yes; carrier status: BRCA1/BRCA2 vs intermediate risk (RAD51C carrier/RAD51D carrier/BRIP1 carrier/BRCA negative but strong FH of OC/BRCA untested but strong FH of OC); marital status: in a relationship (married, cohabiting/living with partner) vs not in a relationship (single, divorced, separated, widowed); ethnicity: non-Caucasian vs Caucasian; education: university level education (PhD, Masters, Bachelors degree) vs below university level education (NVQ4, A-level/NVQ3, NVQ1/NVQ2, GCSE/O-level/CSE, no formal qualification); timing of future OC prevention surgery: planning surgery now/within 5 years vs not planning surgery; FH BC (FH of BC alone plus FH of BC and OC): yes vs no; FH OC (FH of OC alone plus FH of OC and BC): yes vs no; FH BC and OC: yes vs no; hot flushes/night sweats: yes vs no; looking older: yes vs no; decreased libido/other sexual side effects: yes vs no; loss of fertility: yes vs no; osteoporosis (self-reported): yes vs no; heart disease: yes vs no; dementia/memory dysfunction: yes vs no; impact on survival: yes vs no; acceptability of having to take HRT until 51 years: yes vs no; reduces risk of OC without premature menopause: yes vs no; inspection of tubes/ovaries by doctor: yes vs no; delays hot flushes/night sweats: yes vs no; delays osteoporosis: yes vs no; delays potential change to sexual function: yes vs no; not associated with increased risk of heart disease: yes vs no; two staged surgery: yes vs no; potential premature menopause: yes vs no; increased complication rate: yes vs no; interval monitoring between surgeries: yes vs no; additional time in hospital: yes vs no; additional time off work for surgery/post-operative recovery: yes vs no; precise level of OC risk reduction with ES unknown: yes vs no; developing an interval OC between the two surgeries: yes vs no.

**Table S2.** Satisfaction and regret according to menopausal status at the time of RRSO

|                                                                    | Pre-menopausal salpingo-oophorectomy |                    |                            |                    | Post-menopausal salpingo-oophorectomy |                   |                   |                            |                   | P value           |                |
|--------------------------------------------------------------------|--------------------------------------|--------------------|----------------------------|--------------------|---------------------------------------|-------------------|-------------------|----------------------------|-------------------|-------------------|----------------|
|                                                                    | Strongly disagree                    | Disagree           | Neither agree nor disagree | Agree              | Strongly Agree                        | Strongly disagree | Disagree          | Neither agree nor disagree | Agree             |                   | Strongly Agree |
| <b>It was the right decision</b>                                   | 5/161<br>(3.11%)                     | 5/161<br>(3.11%)   | 8/161<br>(4.97%)           | 18/161<br>(11.18%) | 125/161<br>(77.64%)                   | 1/84<br>(1.19%)   | 1/84<br>(1.19%)   | 2/84 (2.38%)               | 8/84<br>(9.52%)   | 72/84<br>(85.71%) | 0.635          |
| <b>I regret the choice that was made</b>                           | 114/160<br>(71.25%)                  | 23/160<br>(14.38%) | 8/160 (5%)                 | 11/160<br>(6.88%)  | 4/160<br>(2.5%)                       | 74/81<br>(91.36%) | 4/81<br>(4.94%)   | 2/81 (2.47%)               | 1/81<br>(1.23%)   | 0/81<br>(0%)      | 0.008          |
| <b>I would make the same decision if I had to do it over again</b> | 5/161<br>(3.11%)                     | 6/161<br>(3.73%)   | 9/161<br>(5.59%)           | 27/161<br>(16.77%) | 114/161<br>(70.81%)                   | 3/84<br>(3.57%)   | 1/84<br>(1.19%)   | 1/84 (1.19%)               | 9/84<br>(10.71%)  | 70/84<br>(83.33%) | 0.186          |
| <b>The decision did me a lot of harm</b>                           | 91/160<br>(56.88%)                   | 36/160<br>(22.5%)  | 15/160<br>(9.38%)          | 12/160<br>(7.5%)   | 6/160<br>(3.75%)                      | 65/80<br>(81.25%) | 8/80<br>(10%)     | 3/80 (3.75%)               | 0/80<br>(0%)      | 4/80<br>(5%)      | 0.006          |
| <b>The decision was a wise one</b>                                 | 4/158<br>(2.53%)                     | 3/158<br>(1.9%)    | 4/158<br>(2.53%)           | 41/158<br>(25.95%) | 106/158<br>(67.09%)                   | 2/83<br>(2.41%)   | 0/83<br>(0%)      | 4/83 (4.82%)               | 11/83<br>(13.25%) | 66/83<br>(79.52%) | 0.088          |
| <b>I was directly influenced by the direct wishes of my family</b> | 86/160<br>(53.75%)                   | 28/160<br>(17.5%)  | 34/160<br>(21.25%)         | 9/160<br>(5.62%)   | 3/160<br>(1.88%)                      | 43/82<br>(52.44%) | 9/82<br>(10.98%)  | 17/82<br>(20.73%)          | 10/82<br>(12.2%)  | 3/82<br>(3.66%)   | 0.257          |
| <b>I was influenced by the unexpressed wishes of my family</b>     | 88/159<br>(55.35%)                   | 27/159<br>(16.98%) | 34/159<br>(21.38%)         | 6/159<br>(3.77%)   | 4/159<br>(2.52%)                      | 52/79<br>(65.82%) | 10/79<br>(12.66%) | 15/79<br>(18.99%)          | 2/79<br>(2.53%)   | 0/79<br>(0%)      | 0.501          |

This table compares satisfaction and regret responses in women who have undergone premenopausal and postmenopausal RRSO.

**Table S3.** Effect of menopausal sequelae on satisfaction and regret amongst women who have undergone premenopausal RRSO

| <b>Model and variable</b>                    | <b>Coef.</b> | <b>Std. Err</b> | <b>P&gt; z </b> | <b>95% CI</b>     |
|----------------------------------------------|--------------|-----------------|-----------------|-------------------|
| <b>Decision Regret Scale</b>                 |              |                 |                 |                   |
| Hot flushes                                  | 18.273       | 10.786          | 0.092           | 3.051 to 39.597   |
| Night sweats                                 | 21.526       | 10.554          | 0.043           | 0.66 to 42.393    |
| Sleep disturbance                            | 40.216       | 10.615          | <0.001          | 19.227 to 61.204  |
| Vaginal dryness                              | 35.005       | 10.921          | 0.002           | 13.414 to 56.596  |
| Sexual dysfunction                           | 43.242       | 9.711           | <0.001          | 24.043 to 62.440  |
| Osteoporosis                                 | 1.246        | 8.289           | 0.881           | -15.141 to 17.633 |
| Urinary incontinence                         | 42.294       | 14.436          | 0.004           | 13.754 to 70.835  |
| Fatigue                                      | 34.501       | 10.673          | 0.002           | 13.399 to 55.602  |
| Memory loss                                  | 23.738       | 11.174          | 0.035           | 1.646 to 45.83    |
| Mood alterations                             | 48.464       | 9.926           | <0.001          | 28.838 to 68.089  |
| Negative impact on relationship with partner | 56.882       | 10.642          | <0.001          | 35.839 to 77.926  |

Multiple linear regression analysis on effect of various menopausal sequelae on satisfaction and regret levels in 164 women who have undergone premenopausal RRSO. Analysis adjusted for marital status, ethnicity, education, income, family history of ovarian cancer and family history of breast cancer.

Decision Regret Scale: 5 item questionnaire with each item scored on a five point Likert-scale from 0-100 with total scores ranging from 0-500. Higher scores indicate less satisfaction/more regret.

Hot flushes: yes vs no; night sweats: yes vs no; sleep disturbance: yes vs no; vaginal dryness: yes vs no; sexual dysfunction: yes vs no; loss of fertility: yes vs no; osteoporosis (self-reported): yes vs no; urinary incontinence: yes vs no; fatigue: yes vs no; memory loss: yes vs no; mood alterations: yes vs no; impact on relationship with partner: yes vs no.

**Table S4.** Effect off HRT use versus non-use on menopausal sequelae in women who have undergone premenopausal RRSO

| <b>Menopausal sequelae</b>                          | <b>OR</b> | <b>Std. Err</b> | <b>P&gt; z </b> | <b>95% CI</b>  |
|-----------------------------------------------------|-----------|-----------------|-----------------|----------------|
| <b>Hot flushes</b>                                  | 0.454     | 0.421           | 0.06            | 0.194 to 1.019 |
| <b>Night sweats</b>                                 | 0.780     | 0.396           | 0.531           | 0.357 to 1.694 |
| <b>Sleep disturbance</b>                            | 0.429     | 0.441           | 0.055           | 0.175 to 1.000 |
| <b>Vaginal dryness</b>                              | 0.397     | 0.413           | 0.025           | 0.172 to 0.879 |
| <b>Sexual dysfunction</b>                           | 0.898     | 0.394           | 0.784           | 0.41 to 1.939  |
| <b>Osteoporosis</b>                                 | 0.716     | 0.431           | 0.438           | 0.306 to 1.669 |
| <b>Urinary incontinence</b>                         | 1.367     | 0.439           | 0.475           | 0.583 to 3.287 |
| <b>Fatigue</b>                                      | 0.593     | 0.417           | 0.21            | 0.257 to 1.331 |
| <b>Memory loss</b>                                  | 1.138     | 0.374           | 0.729           | 0.546 to 2.374 |
| <b>Mood alterations</b>                             | 1.052     | 0.392           | 0.897           | 0.487 to 2.279 |
| <b>Negative impact on relationship with partner</b> | 1.231     | 0.38            | 0.584           | 0.586 to 2.611 |

Multiple logistic regression analysis on effect of HRT use versus non-use on menopausal sequelae in 88 women who have undergone premenopausal RRSO. Analysis adjusted for marital status, ethnicity, education, income, family history of ovarian cancer and family history of breast cancer. Analysis excludes women with a previous history of breast cancer who were ineligible for HRT.

Hot flushes: yes vs no; night sweats: yes vs no; sleep disturbance: yes vs no; vaginal dryness: yes vs no; sexual dysfunction: yes vs no; loss of fertility: yes vs no; osteoporosis (self-reported): yes vs no; urinary incontinence: yes vs no; fatigue: yes vs no; memory loss: yes vs no; mood alterations: yes vs no; impact on relationship with partner: yes vs no.

**Table S5.** Prevalence of menopausal sequelae by menopausal status at the time off RRSO

|                                                         | <b>Premenopausal<br/>RRSO</b> | <b>Postmenopausal<br/>RRSO</b> | <b>P value</b> |
|---------------------------------------------------------|-------------------------------|--------------------------------|----------------|
| <b>Hot flushes</b>                                      | 111/163 (68.1%)               | 23/59 (38.98%)                 | <0.001         |
| <b>Night sweats</b>                                     | 109/163 (66.87%)              | 15/59 (25.42%)                 | <0.001         |
| <b>Sleep disturbance</b>                                | 120/162 (74.07%)              | 24/59 (40.68%)                 | <0.001         |
| <b>Vaginal dryness</b>                                  | 100/163 (61.35%)              | 33/59 (55.93%)                 | 0.536          |
| <b>Sexual dysfunction</b>                               | 108/163 (66.26%)              | 33/59 (55.93%)                 | 0.207          |
| <b>Osteoporosis (self reported)</b>                     | 38/162 (23.46%)               | 24/59 (40.68%)                 | 0.017          |
| <b>Urinary incontinence</b>                             | 39/163 (23.93%)               | 17/60 (28.33%)                 | 0.492          |
| <b>Fatigue</b>                                          | 115/163 (70.55%)              | 29/59 (49.15%)                 | 0.004          |
| <b>Memory loss</b>                                      | 97/163 (59.51%)               | 19/57 (33.33%)                 | 0.001          |
| <b>Mood alterations</b>                                 | 103/162 (63.58%)              | 18/59 (30.51%)                 | <0.001         |
| <b>Negative impact on<br/>relationship with partner</b> | 80/160 (50%)                  | 15/56 (26.79%)                 | 0.003          |

The table compares the proportion of women experiencing menopausal sequelae post-surgery in women who have undergone premenopausal and postmenopausal RRSO.
